# Supplementary material
Source: PubMed Central journal article supplement (PMC10527461)
Supplement: NIHMS1905841-supplement-Supplemental_Data_File___doc___tif__pdf__etc___1.pdf [file NIHMS1905841-supplement-Supplemental_Data_File___doc___tif__pdf__etc___1.pdf]

|                                                  | <i>Pre-Pandemic</i> | <i>Peak-Pandemic</i> | <i>Late-Pandemic</i> |
|--------------------------------------------------|---------------------|----------------------|----------------------|
| <i>Assessment visits scheduled</i>               | 56                  | 51                   | 54                   |
| <i>Assessment completion rate</i>                | 100%                | 100%                 | 100%                 |
| <i>Assessment visits completed via in-person</i> | 56                  | 30                   | 52                   |
| <i>Assessment visits completed by telehealth</i> | 0                   | 21                   | 2                    |
| <i>In-person assessment completion rate</i>      | 100%                | 59%                  | 96%                  |
| <i>Telehealth assessment completion rate</i>     | 0%                  | 41%                  | 4%                   |
