# Supplementary material
Source: PubMed Central journal article supplement (PMC10527461)
Supplement: NIHMS1905841-supplement-Supplemental_Data_File___doc___tif__pdf__etc___2.pdf [file NIHMS1905841-supplement-Supplemental_Data_File___doc___tif__pdf__etc___2.pdf]

|                                 | <i>Pandemic Time Periods</i> |               |               |                      |                |                |                      |               |               |                  |
|---------------------------------|------------------------------|---------------|---------------|----------------------|----------------|----------------|----------------------|---------------|---------------|------------------|
|                                 | <i>Pre-Pandemic</i>          |               |               | <i>Peak-Pandemic</i> |                |                | <i>Late-Pandemic</i> |               |               | <i>Total</i>     |
| <i>Specific Outcome Measure</i> | <i>IP</i>                    | <i>Hybrid</i> | <i>Missed</i> | <i>IP</i>            | <i>Hybrid</i>  | <i>Missed</i>  | <i>IP</i>            | <i>Hybrid</i> | <i>Missed</i> |                  |
| <i>GMA</i>                      | 45/45<br>(100%)              | 0/45<br>(0%)  | 0/45<br>(0%)  | 19/26<br>(73%)       | 6/26<br>(23%)  | 1/26<br>(4%)   | 32/32<br>(100%)      | 0/32<br>(0%)  | 0/32<br>(0%)  | 101/103<br>(98%) |
| <i>TIMP</i>                     | 45/45<br>(100%)              | 0/45<br>(0%)  | 0/45<br>(0%)  | 19/26<br>(73%)       | 1/26<br>(4%)   | 5/26<br>(19%)  | 29/32<br>(81%)       | 0/32<br>(0%)  | 3/32<br>(9%)  | 94/103<br>(91%)  |
| <i>APSP</i>                     | 28/28<br>(100%)              | 0/28<br>(0%)  | 0/45<br>(0%)  | 15/36<br>(42%)       | 21/36<br>(58%) | 0/36<br>(0%)   | 32/35<br>(91%)       | 2/35<br>(6%)  | 0/35<br>(0%)  | 98/99<br>(99%)   |
| <i>GMFM</i>                     | 27/28<br>(96%)               | 0/28<br>(0%)  | 1/28<br>(4%)  | 15/36<br>(42%)       | 21/36<br>(58%) | 0/36<br>(0%)   | 32/35<br>(91%)       | 2/35<br>(6%)  | 1/35<br>(3%)  | 97/99<br>(98%)   |
| <i>BSID-III</i>                 | 26/28<br>(93%)               | 0/28<br>(0%)  | 2/28<br>(7%)  | 15/36<br>(42%)       | 8/36<br>(22%)  | 13/36<br>(36%) | 33/35<br>(94%)       | 1/35<br>(3%)  | 1/35<br>(3%)  | 83/99<br>(84%)   |
| <i>HINE</i>                     | 23/28<br>(82%)               | 0/28<br>(0%)  | 5/28<br>(17%) | 11/36<br>(31%)       | 8/36<br>(22%)  | 17/36<br>(47%) | 29/35<br>(83%)       | 0/35<br>(0%)  | 6/35<br>(17%) | 71/99<br>(72%)   |
