# Supplementary material
Source: PubMed Central journal article supplement (PMC10527461)
Supplement: NIHMS1905841-supplement-Supplemental_Data_File___doc___tif__pdf__etc___3.pdf [file NIHMS1905841-supplement-Supplemental_Data_File___doc___tif__pdf__etc___3.pdf]

**SPEEDI-Early Group**

| <i>Pandemic Period</i> | <i>Phase 1 Visits</i> |                   | <i>Phase 2 Visits</i> |                   | <i>Total Visits Scheduled</i> | <i>Total Visits Completed</i> |
|------------------------|-----------------------|-------------------|-----------------------|-------------------|-------------------------------|-------------------------------|
|                        | <i>In-Person</i>      | <i>Telehealth</i> | <i>In-Person</i>      | <i>Telehealth</i> |                               |                               |
| <i>Pre-Pandemic</i>    | 30/30<br>(100%)       | 0/30<br>(0%)      | 26/26<br>(100%)       | 0/26<br>(0%)      | 56                            | 56                            |
| <i>Peak-Pandemic</i>   | 17/20<br>(85%)        | 3/20<br>(15%)     | 3/20<br>(15%)         | 16/20<br>(80%)    | 40                            | 39                            |
| <i>Late-Pandemic</i>   | 18/20<br>(90%)        | 0/20<br>(0%)      | 23/24<br>(96%)        | 1/24<br>(4%)      | 44                            | 42                            |

**SPEEDI-Late Group**

| <i>Pandemic Period</i> | <i>Phase 1 Visits</i> |                   | <i>Phase 2 Visits</i> |                   | <i>Total Visits Scheduled</i> | <i>Total Visits Completed</i> |
|------------------------|-----------------------|-------------------|-----------------------|-------------------|-------------------------------|-------------------------------|
|                        | <i>In-Person</i>      | <i>Telehealth</i> | <i>In-Person</i>      | <i>Telehealth</i> |                               |                               |
| <i>Pre-Pandemic</i>    | 30/30<br>(100%)       | 0/30<br>(0%)      | 26/27<br>(100%)       | 0/27<br>(0%)      | 57                            | 56                            |
| <i>Peak-Pandemic</i>   | 0/10<br>(0%)          | 10/10<br>(100%)   | 0/13<br>(0%)          | 13/13<br>(100%)   | 23                            | 23                            |
| <i>Late-Pandemic</i>   | 18/20<br>(90%)        | 2/20<br>(10%)     | 19/20<br>(95%)        | 1/20<br>(5%)      | 40                            | 40                            |
