# Supplementary material
Source: PubMed Central journal article supplement (PMC10527461)
Supplement: NIHMS1905841-supplement-Supplemental_Data_File___doc___tif__pdf__etc___4.pdf [file NIHMS1905841-supplement-Supplemental_Data_File___doc___tif__pdf__etc___4.pdf]

|                                                   | Peak- Pandemic<br>(n=5) | Late-Pandemic<br>(n=11) |
|---------------------------------------------------|-------------------------|-------------------------|
| Parent Employed                                   | 5                       | 7                       |
| Siblings at home                                  | 3                       | 4                       |
| Internet Capable Device                           | 3                       | 6                       |
| Technology Issues                                 | 1                       | 1                       |
| COVID exposure                                    | 3                       | 3                       |
| COVID impacted participation<br>in research study | 0                       | 2                       |
